# Supplementary material
Source: PubMed Central journal article supplement (PMC3392632)

Supp Figure 1

phospho-Akt

Fas III

merge

control -8h

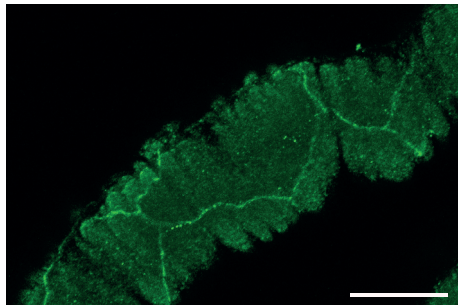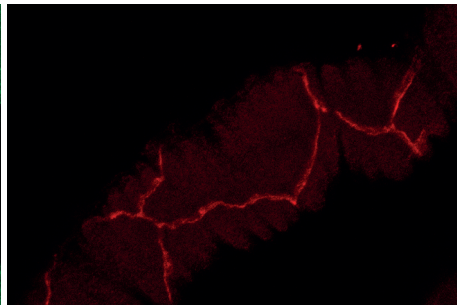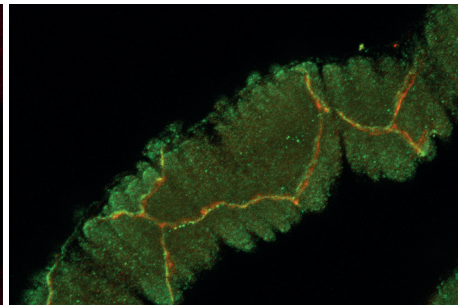

*Atg1<sup>IR</sup>* -8h

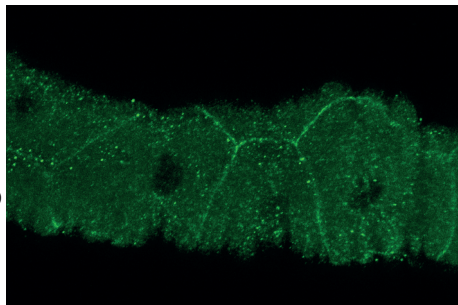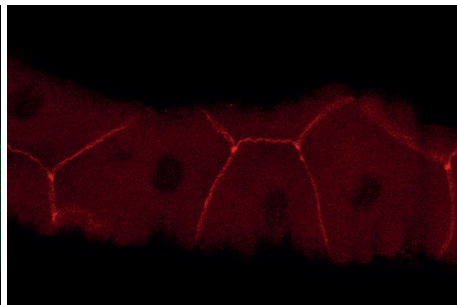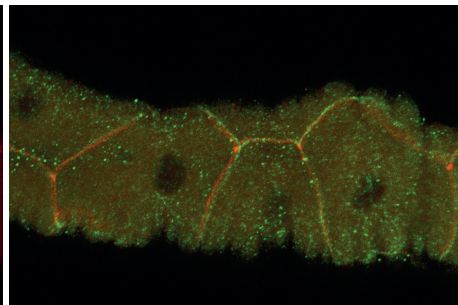

*Atg18<sup>IR</sup>* -8h

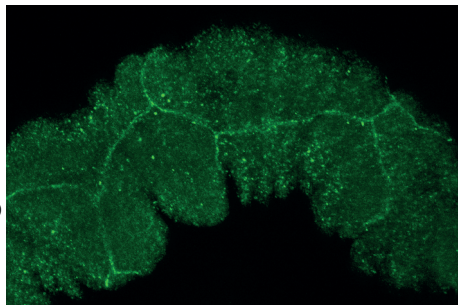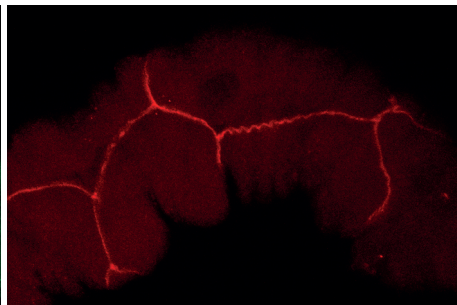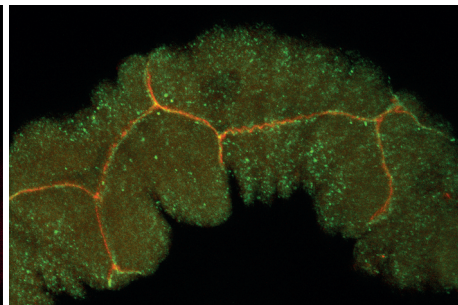

Supplement: cdd201243x1.pdf [file cdd201243x1.pdf]

Supp Figure 2

morphology +4h

histology +12h

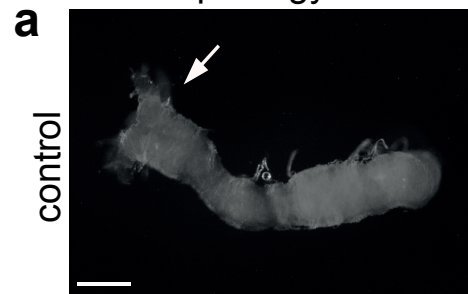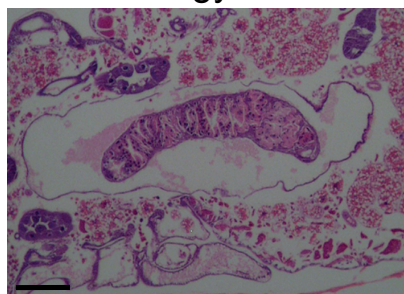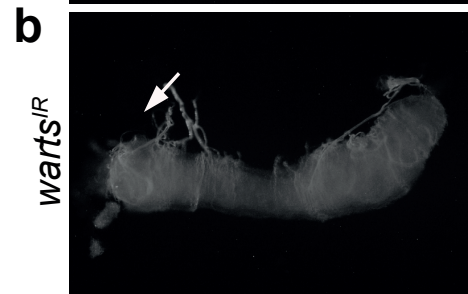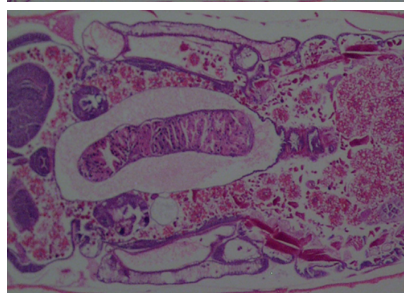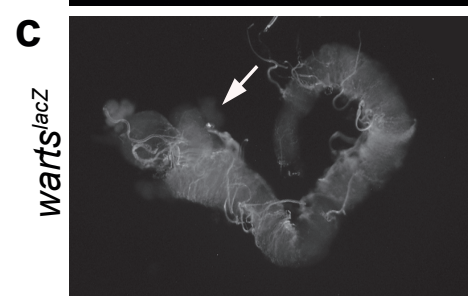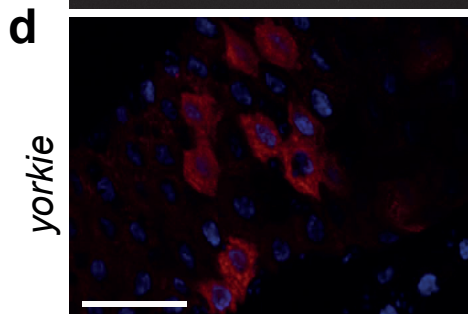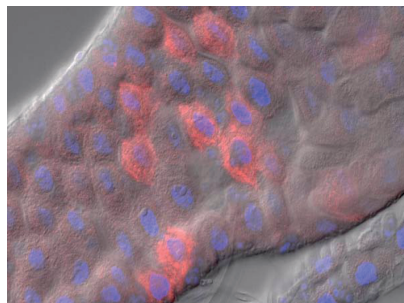

**e** Gastic caeca size +4h

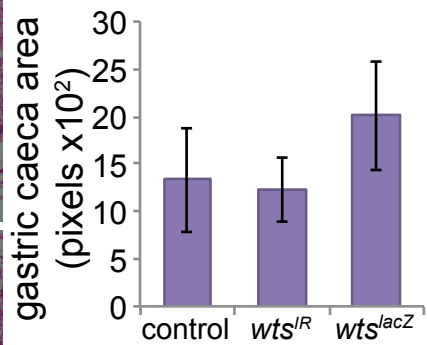

Supplement: cdd201243x2.pdf [file cdd201243x2.pdf]

Supp Figure 3

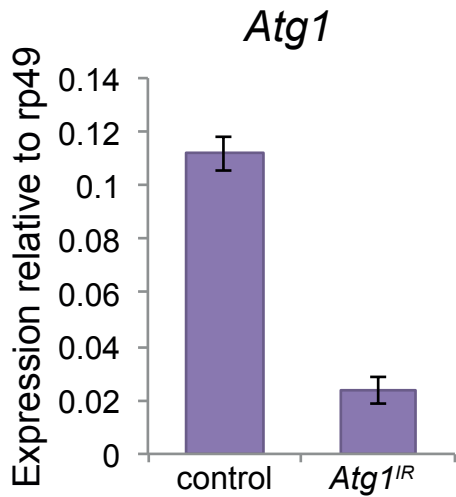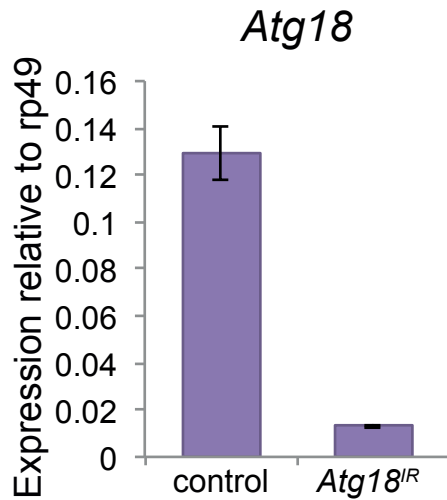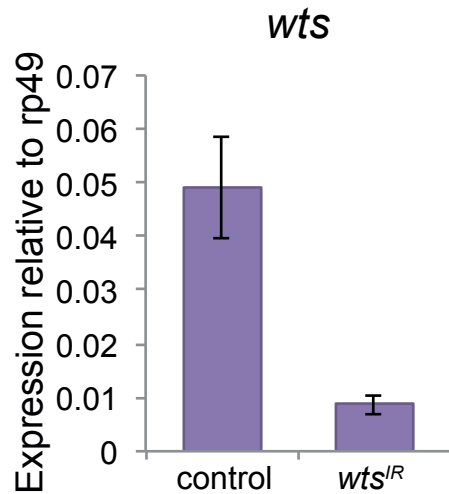

Supplement: cdd201243x3.pdf [file cdd201243x3.pdf]
